# Supplementary material for: Identification of α-glucosidase inhibitors fromcyclocarya paliurustea leaves using UF-UPLC-Q/TOF-MS/MS and molecular docking
Source: Royal Society of Chemistry journal article supplement (doi:10.1039/c8fo01845f), 2019-01-01
Supplement: c8fo01845f1.pdf [file c8fo01845f1.pdf]

## Supplementary information

**Table S1. The structural template candidates for homology modeling of yeast  $\alpha$ -glucosidase (YEAST\_MAL32).**

| PDB ID      | Chain ID | Title                                                                       | Length (a.a.) | Identities           | Ligand                                     | Method       | Resolution (Å) |
|-------------|----------|-----------------------------------------------------------------------------|---------------|----------------------|--------------------------------------------|--------------|----------------|
| 3A47        | A        | Crystal structure of isomaltase from <i>Saccharomyces cerevisiae</i>        | 587           | 422/587 (72%)        | Ca <sup>2+</sup>                           | X-Ray        | 1.59           |
| <b>3A4A</b> | <b>A</b> | <b>Crystal structure of isomaltase from <i>Saccharomyces cerevisiae</i></b> | <b>587</b>    | <b>422/587 (72%)</b> | <b>Ca<sup>2+</sup><br/>Alpha-D-Glucose</b> | <b>X-Ray</b> | <b>1.60</b>    |
| 3AJ7        | A        | Crystal                                                                     | 587           | 422/587              | Ca <sup>2+</sup>                           | X-ray        | 1.3            |

|      |   |                                                                        |     |                  |                                         |       |     |
|------|---|------------------------------------------------------------------------|-----|------------------|-----------------------------------------|-------|-----|
|      |   | structure of<br>isomaltase<br>from<br>Saccharomyces cerevisiae         |     | 7<br>(72%)       |                                         |       |     |
| 3AXH | A | Crystal<br>structure of<br>isomaltase in<br>complex with<br>isomaltose | 587 | 421/587<br>(72%) | Ca <sup>2+</sup><br>Alpha-D-<br>Glucose | X-ray | 1.8 |
| 3AXI | A | Crystal<br>structure of<br>isomaltase in<br>complex with<br>isomaltose | 587 | 421/587<br>(72%) | Ca <sup>2+</sup><br>Alpha-D-<br>Glucose | X-ray | 1.4 |

**A**

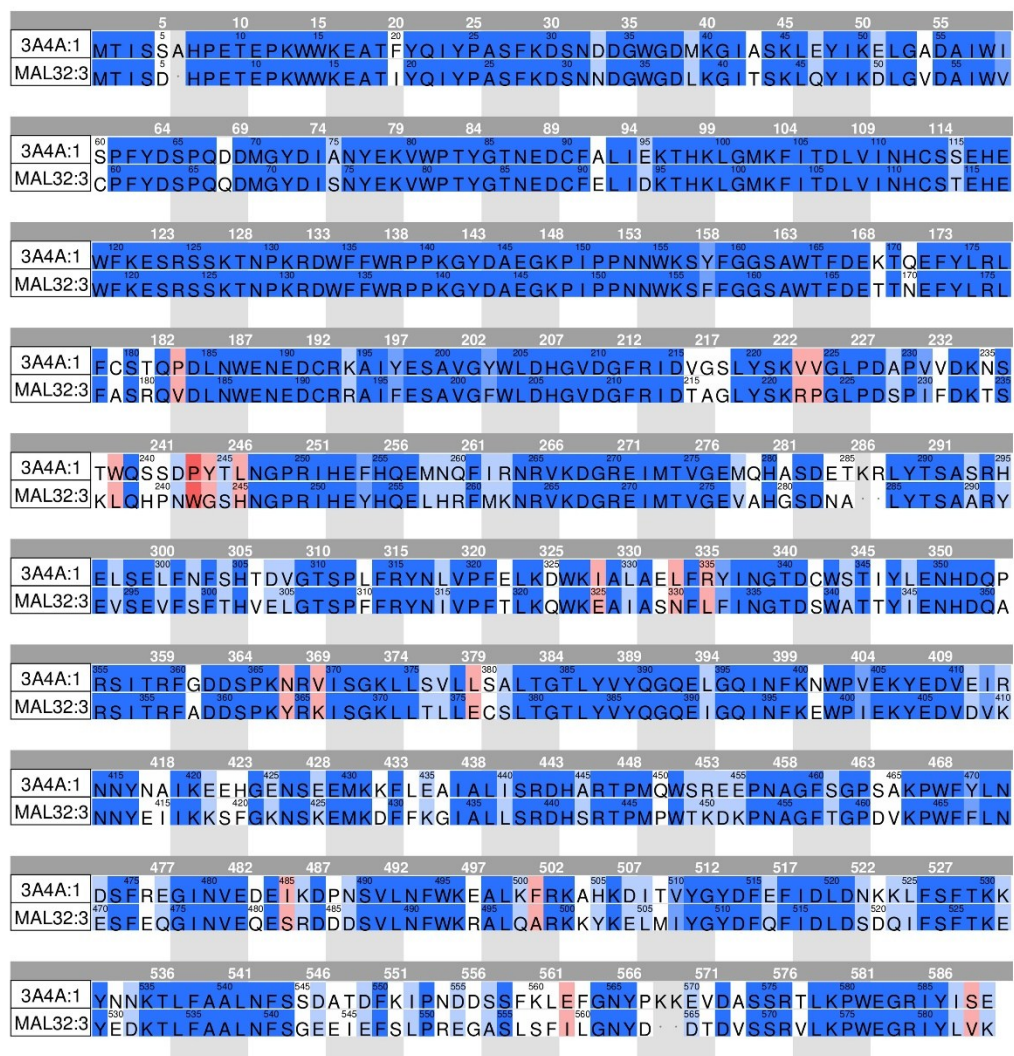

**B**

|               | 1    | 2    |
|---------------|------|------|
| 1:3A4A.A      |      | 85.8 |
| 2:MAL32_YEAST | 85.1 |      |

**C**

|               | 1    | 2    |
|---------------|------|------|
| 1:3A4A.A      |      | 72.3 |
| 2:MAL32_YEAST | 71.6 |      |

**Figure S1. Sequence alignment between yeast  $\alpha$ -glucosidase (mal32) and structural template (yeast isomaltase, PDB ID: 3A4A). (A) Sequence alignment colored by residue similarity (blue, similar; pink, dissimilar). (B) Sequence similarity. (C) Sequence identity.**

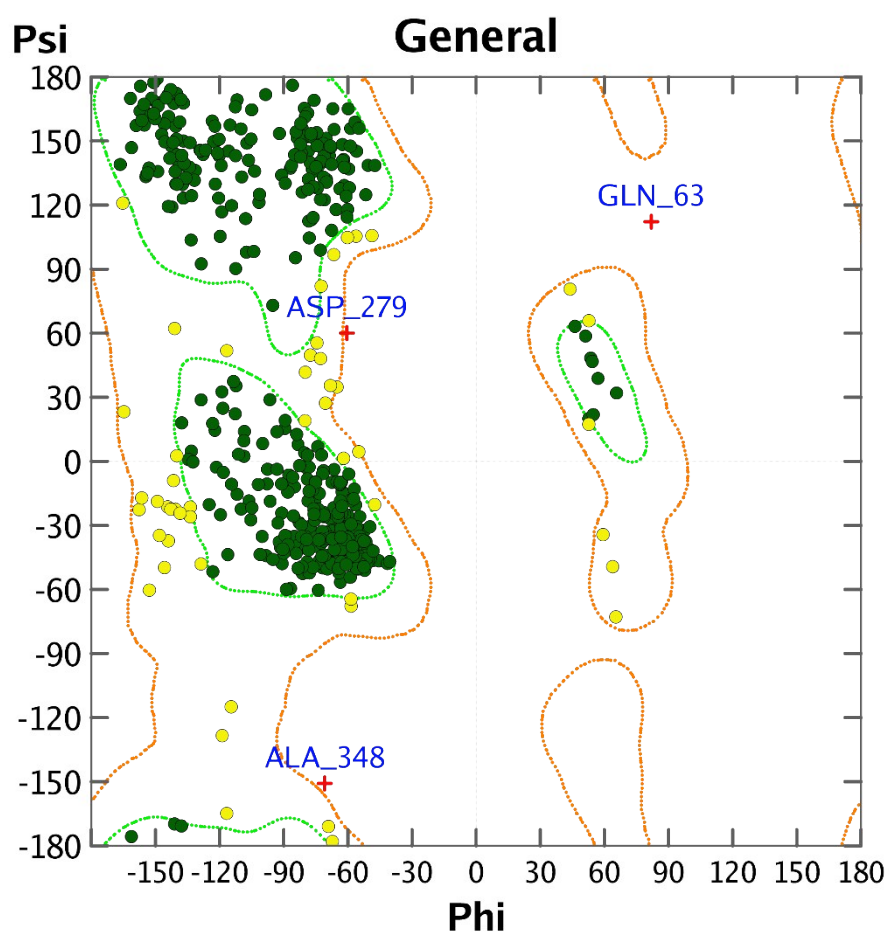

**Figure S2. Phi-Psi plot (Ramachandran plot) of putative model of yeast  $\alpha$ -glucosidase resulted from homology modeling and molecular dynamics simulation.**
